# Supplementary material
Source: PubMed Central journal article supplement (PMC2852189)
Supplement: NIHMS189501-supplement-Supp1.pdf [file NIHMS189501-supplement-Supp1.pdf]

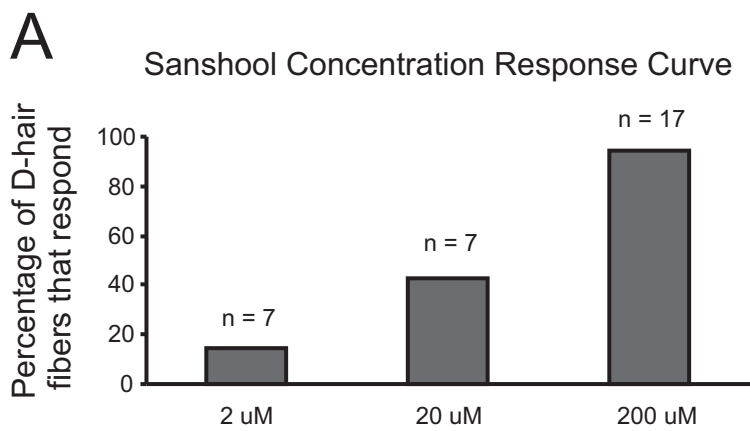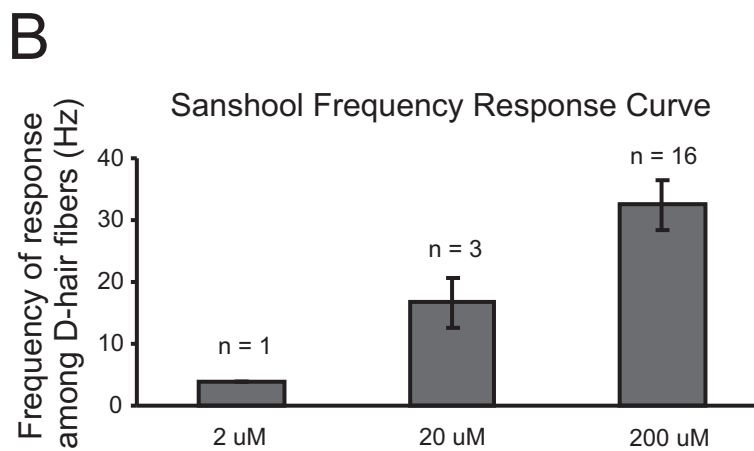

**A**

TRPV1 antag. (A-425619) & TRPA1 antag. (HC-030031)

Baseline

Sanshool

Cap & MO

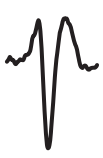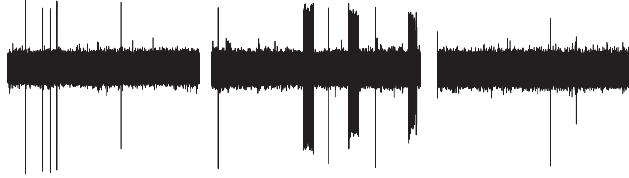

100  $\mu$ V  
30 s

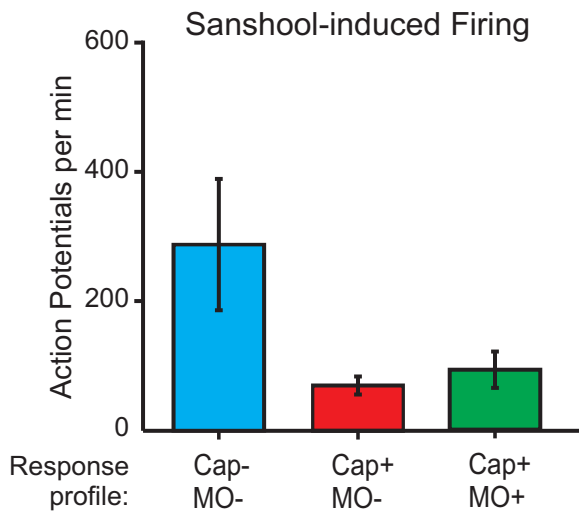

### C Fiber Conduction Velocities

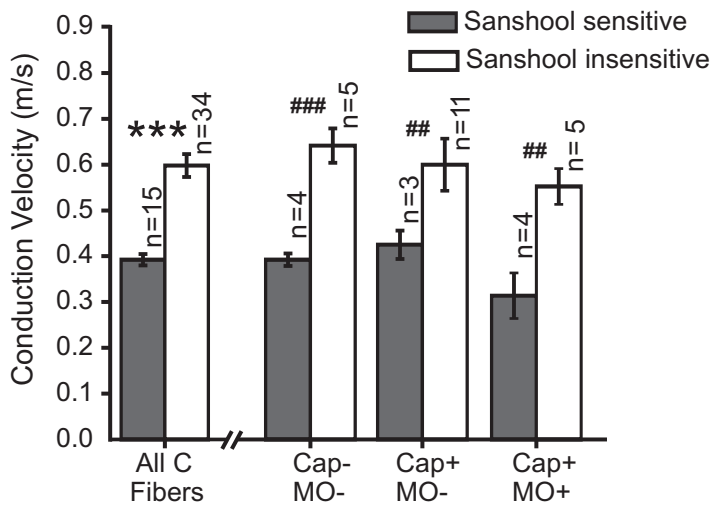

| Fiber Type | Sanshool Sensitivity | n  | Median Von Frey Threshold (mN) | 1 <sup>st</sup> Quartile | 3 <sup>rd</sup> Quartile | Mean Electric Threshold (mA) | ± SEM | Mean Conduction Velocity (m/s) | ± SEM |
|------------|----------------------|----|--------------------------------|--------------------------|--------------------------|------------------------------|-------|--------------------------------|-------|
| Aβ RA      | sensitive            | 8  | 1.65                           | 1.63                     | 2.25                     | 2.4                          | 0.2   | 12.5                           | 1.1   |
|            | insensitive          | 11 | 1.65                           | 0.66                     | 4.00                     | 2.2                          | 0.1   | 13.6                           | 1.2   |
| Aβ SA      | sensitive            | 7  | 1.63                           | 1.15                     | 2.82                     | 2.08                         | 0.06  | 12.6                           | 0.8   |
|            | insensitive          | 12 | 0.66                           | 0.66                     | 1.63                     | 2.08                         | 0.08  | 12.1                           | 0.4   |
| D-hair     | sensitive            | 22 | 0.27                           | 0.22                     | 0.27                     | 2.19                         | 0.09  | 4.8                            | 0.5   |
|            | insensitive          | 1  | 0.22                           | --                       | --                       | 2.31                         | --    | 8.1                            | --    |
| AM         | sensitive            | 0  | --                             | --                       | --                       | --                           | --    | --                             | --    |
|            | insensitive          | 30 | 6.80                           | 4.0                      | 10.5                     | 1.92                         | .04   | 5.2                            | 0.5   |
| C fiber    | sensitive            | 15 | 4.00                           | 1.66                     | 14.6                     | 2.22                         | 0.08  | 0.38                           | 0.02  |
|            | insensitive          | 34 | 6.80                           | 4.00                     | 11.7                     | 2.22                         | 0.08  | 0.59                           | 0.04  |

|             | Sanshool (200 $\mu$ M) | n  | Capsaicin (1 $\mu$ M) | n  | Mustard Oil (1 mM)  | n  |
|-------------|------------------------|----|-----------------------|----|---------------------|----|
| Sensitive   | 0.38 $\pm$ 0.02 m/s ** | 15 | 0.53 $\pm$ 0.04 m/s   | 28 | 0.47 $\pm$ 0.04 m/s | 15 |
| Insensitive | 0.59 $\pm$ 0.04 m/s    | 34 | 0.52 $\pm$ 0.05 m/s   | 21 | 0.55 $\pm$ 0.04 m/s | 34 |
